# Supplementary material for: Predicting nicotine metabolism across ancestries using genotypes
Source: BMC Genomics. 2022 Sep 21;23:663. doi: 10.1186/s12864-022-08884-z (PMC9490935; doi:10.1186/s12864-022-08884-z)
Supplement: Supplementary file 3 — Additional file 3. List of genetic variants nominated for prediction of nicotine metabolism. This file contains the rs number, chromosome, hg19 position, reference allele, and alternative allele for the 263genetic variants selected as candidates for prediction of the nicotine metabolite ratio. [file 12864_2022_8884_MOESM3_ESM.csv]

List of genetic variants nominated for prediction of nicotine metabolism. This file contains the rs number, chromosome, hg19 position, reference allele, and alternative allele for the 263 genetic variants selected as candidates for prediction of the nicotine metabolite ratio.
	rs_number	chromosome	hg19position	reference_allele	alternate_allele
1	rs10030841	4	150734606	C	A
2	rs10402037	19	41536961	C	G
3	rs10402070	19	41537050	A	G
4	rs10402611	19	41537045	G	C
5	rs10403140	19	41537448	C	T
6	rs10403268	19	41537326	G	A
7	rs10403330	19	41537510	C	T
8	rs10409585	19	41538059	A	T
9	rs10409738	19	41537992	C	T
10	rs10410347	19	41538108	G	A
11	rs10410867	19	41537850	T	C
12	rs10413473	19	41381936	G	A
13	rs10413524	19	41534976	C	T
14	rs10415473	19	41535095	T	G
15	rs10418318	19	41395036	G	A
16	rs10419321	19	41532654	G	C
17	rs10419393	19	41404196	A	G
18	rs10420699	19	41532738	T	A
19	rs10421834	19	41536237	G	T
20	rs10422151	19	41536503	C	T
21	rs10422282	19	41536416	G	A
22	rs10422729	19	41536642	G	A
23	rs10422829	19	41536147	T	G
24	rs10423165	19	41392466	G	C
25	rs10423743	19	41536547	T	G
26	rs10424716	19	41532885	C	A
27	rs10425152	19	41533112	C	T
28	rs10425384	19	41533212	C	T
29	rs1080234	19	41538741	C	T
30	rs1080235	19	41538738	T	A
31	rs1081649	12	63273578	G	A
32	rs10922701	1	88328100	G	A
33	rs112819506	19	41444725	A	G
34	rs113406465	2	1529343	C	A
35	rs115248135	19	41490634	A	C
36	rs1156020	7	68443918	G	A
37	rs115946529	19	41491579	C	G
38	rs115994486	19	41511306	G	A
39	rs116382863	19	41534881	C	T
40	rs116548898	19	41497601	G	A
41	rs11666974	19	41376000	T	A
42	rs11667928	19	41535348	T	C
43	rs11670678	19	41534633	C	G
44	rs11670760	19	41336795	T	C
45	rs11673685	19	41533256	T	C
46	rs116810094	19	41358684	G	C
47	rs116921376	19	41333726	C	G
48	rs11705950	3	105289655	G	A
49	rs117139969	19	41311922	T	G
50	rs11724795	4	148751230	G	A
51	rs117248593	19	41282372	C	T
52	rs117287096	19	41341413	G	A
53	rs11731269	4	69625414	G	A
54	rs11737672	4	69671302	T	C
55	rs117391664	19	41309150	G	A
56	rs117422348	19	41344466	C	T
57	rs117540499	19	41406448	G	A
58	rs117821847	19	41310888	C	T
59	rs117824460	19	41371480	A	G
60	rs117851058	19	41309590	G	A
61	rs117947334	19	41302375	C	T
62	rs11878604	19	41333284	T	C
63	rs11879413	19	41337923	C	T
64	rs11879790	19	41532279	A	G
65	rs11881918	19	41334199	G	A
66	rs12036910	1	212801456	T	C
67	rs12046902	1	182292766	A	G
68	rs12052092	19	41318899	T	A
69	rs12118935	1	164630545	G	C
70	rs12151196	19	41376777	A	G
71	rs12227120	12	79801592	T	C
72	rs12295316	11	12994112	T	C
73	rs12372234	12	558423	C	T
74	rs12409524	1	182625258	T	C
75	rs12459249	19	41339896	T	C
76	rs12459565	19	41427539	G	C
77	rs12589603	14	38699075	G	A
78	rs12601998	17	11601869	T	G
79	rs12609370	19	41328516	G	A
80	rs12610426	19	41367663	T	G
81	rs12629059	3	131581274	T	G
82	rs12636973	3	131581365	G	T
83	rs12934802	16	87949622	G	T
84	rs12973666	19	41289397	G	C
85	rs12982314	19	41385774	A	G
86	rs13411643	2	60351132	T	C
87	rs13420896	2	60351045	A	G
88	rs1347596	4	148760078	G	A
89	rs138409398	19	41511421	C	T
90	rs1390647	19	41365887	C	T
91	rs140317732	19	41361274	G	A
92	rs143200968	19	41338847	G	C
93	rs1445213	9	9182216	G	A
94	rs145026630	19	41350217	G	A
95	rs145256949	19	41332357	A	G
96	rs145465996	19	41361350	A	G
97	rs1455434	19	41257046	G	T
98	rs145621068	19	41491843	G	A
99	rs146298249	19	41372861	C	A
100	rs147400515	19	41332067	G	A
101	rs1496402	19	41366134	T	A
102	rs151337674	19	41490220	T	G
103	rs16893106	5	24087556	G	C
104	rs16958956	19	41383378	C	A
105	rs16974878	19	41535954	G	C
106	rs17713068	19	41270055	T	G
107	rs17726258	19	41287605	A	G
108	rs1809925	1	208383253	G	A
109	rs1869710	19	41256375	C	T
110	rs192951572	19	41369075	G	A
111	rs2099361	19	41498348	C	A
112	rs2137906	10	61478755	T	G
113	rs2233152	19	41281016	G	A
114	rs2233153	19	41281106	G	C
115	rs2233156	19	41281700	C	T
116	rs2233159	19	41283365	C	G
117	rs2254326	19	41255889	G	T
118	rs2254338	19	41255603	G	A
119	rs2258314	19	41338835	C	T
120	rs2258380	19	41338988	C	G
121	rs2259217	19	41349233	A	G
122	rs2261144	19	41383153	A	G
123	rs2279011	19	41269288	G	T
124	rs2287691	19	41286163	C	G
125	rs2287692	19	41289756	G	A
126	rs2302986	19	41383215	G	C
127	rs2302988	19	41383344	T	C
128	rs2316205	19	41346768	T	C
129	rs2432547	16	73565299	A	C
130	rs2483216	1	3306720	G	T
131	rs2545761	19	41306234	C	T
132	rs2545763	19	41307170	G	A
133	rs2545772	19	41324746	G	A
134	rs2561553	19	41169518	G	A
135	rs2561554	19	41168196	G	T
136	rs2578109	10	80227321	G	A
137	rs2604860	19	41167721	A	G
138	rs2604894	19	41292404	A	G
139	rs2607416	19	41260831	C	T
140	rs2607418	19	41257396	C	T
141	rs2644890	19	41333251	C	T
142	rs2644915	19	41318327	A	G
143	rs28399438	19	41355919	A	C
144	rs28399442	19	41354458	C	A
145	rs28399443	19	41354306	G	A
146	rs28399453	19	41351400	G	A
147	rs28399459	19	41350787	C	G
148	rs28399462	19	41350615	G	A
149	rs28417358	19	41428105	G	A
150	rs28472879	19	41395755	G	A
151	rs28671673	19	41534941	T	G
152	rs3020318	6	152289770	T	C
153	rs3099800	11	132122159	T	C
154	rs34223104	19	41497129	T	C
155	rs34406232	19	41305530	C	A
156	rs34842714	19	41328196	C	T
157	rs35061187	19	41316898	C	T
158	rs3733829	19	41310571	A	G
159	rs3736329	19	41313202	C	A
160	rs3737451	11	107295445	T	C
161	rs3797218	19	41388707	T	C
162	rs3843043	19	41433931	C	T
163	rs3844443	19	41431935	T	C
164	rs3852872	19	41416143	C	T
165	rs3852873	19	41416260	T	G
166	rs3865453	19	41338556	C	T
167	rs3875149	19	41359996	A	G
168	rs3909341	19	41393326	T	C
169	rs4001923	19	41357493	C	T
170	rs4079366	19	41384675	T	C
171	rs41462550	4	28782951	C	A
172	rs4343391	19	41344368	G	C
173	rs4461527	4	7207480	T	C
174	rs4777788	15	93728147	A	G
175	rs4802091	19	41315318	G	C
176	rs4802095	19	41389625	C	T
177	rs4803367	19	41285873	T	G
178	rs4803369	19	41315980	G	A
179	rs4803378	19	41333441	G	A
180	rs4803380	19	41351169	C	T
181	rs4803397	19	41396865	G	A
182	rs4803400	19	41405962	T	G
183	rs4835461	4	148755716	G	T
184	rs4944461	11	83774430	A	G
185	rs5007415	19	41393760	C	A
186	rs545656	6	149637979	T	C
187	rs55921593	19	41353897	G	T
188	rs55978439	19	41336556	T	A
189	rs56043834	19	41331149	C	T
190	rs56097499	19	41381334	G	A
191	rs56113850	19	41353107	T	C
192	rs56267346	19	41353338	A	G
193	rs56364261	12	129795862	G	T
194	rs57171977	3	105296982	C	T
195	rs60091803	7	56677033	G	A
196	rs60446182	19	41347998	A	G
197	rs60533951	19	41300484	G	A
198	rs61482096	19	41386622	C	T
199	rs61663607	19	41357076	T	C
200	rs630693	11	107197606	G	C
201	rs6438822	3	123714982	C	T
202	rs6502167	17	11630869	C	A
203	rs6508960	19	41437717	G	A
204	rs66889044	19	41338712	C	T
205	rs6691952	1	210771400	A	G
206	rs67210567	19	41357457	G	T
207	rs67421541	19	41394420	C	T
208	rs68051884	1	58324761	A	G
209	rs7152719	14	38687273	T	G
210	rs7245595	19	41295859	G	T
211	rs7246188	19	41339842	A	G
212	rs7247903	19	41372475	A	G
213	rs72480748	19	41414481	G	A
214	rs7251418	19	41341589	A	G
215	rs7251570	19	41341750	A	G
216	rs7252852	19	41403325	T	C
217	rs7254188	19	41407343	G	A
218	rs72549444	19	41351843	G	A
219	rs7255146	19	41532126	C	A
220	rs7258590	19	41408581	C	T
221	rs7259706	19	41357620	C	T
222	rs73034462	19	41418134	G	A
223	rs73038469	19	41442597	G	A
224	rs73048928	19	41323793	G	T
225	rs73222317	3	131516788	G	A
226	rs73222340	3	131534405	G	T
227	rs73371576	18	1566954	G	A
228	rs73827065	4	71847286	G	A
229	rs73931391	19	41407874	A	G
230	rs74026875	16	69603461	A	G
231	rs7507400	19	41330179	G	T
232	rs76171506	19	41366140	C	T
233	rs76617915	19	41538078	G	A
234	rs76714199	19	41403508	C	T
235	rs77100200	7	86560690	G	A
236	rs77789388	16	66411566	A	G
237	rs78011401	19	41332171	C	T
238	rs78112371	8	12660172	A	G
239	rs78475952	4	25689684	A	C
240	rs79016062	19	41283467	G	T
241	rs7937	19	41302706	C	T
242	rs79468636	19	41365550	A	T
243	rs79600176	19	41392490	T	C
244	rs79784238	19	41364445	G	A
245	rs80208490	19	41260723	A	G
246	rs8102683	19	41363765	T	C
247	rs8103097	19	41534289	G	T
248	rs8103372	19	41533990	T	C
249	rs8103444	19	41397661	C	A
250	rs8105704	19	41363898	T	C
251	rs8107978	19	41282275	C	T
252	rs8108939	19	41425149	C	G
253	rs8192720	19	41356310	G	A
254	rs8192726	19	41354496	C	A
255	rs8192728	19	41351538	G	T
256	rs823009	3	194674114	A	C
257	rs890934	19	41227968	G	T
258	rs927204	1	229681006	C	T
259	rs9309116	2	44557919	C	T
260	rs9410159	9	140763253	G	A
261	rs9485148	6	147467648	A	C
262	rs971313	15	55027398	T	C
263	rs990234	12	72398117	C	T
